November 2011

# PSYCHIATRIC SERVICES

A Journal of the  
American Psychiatric  
Association

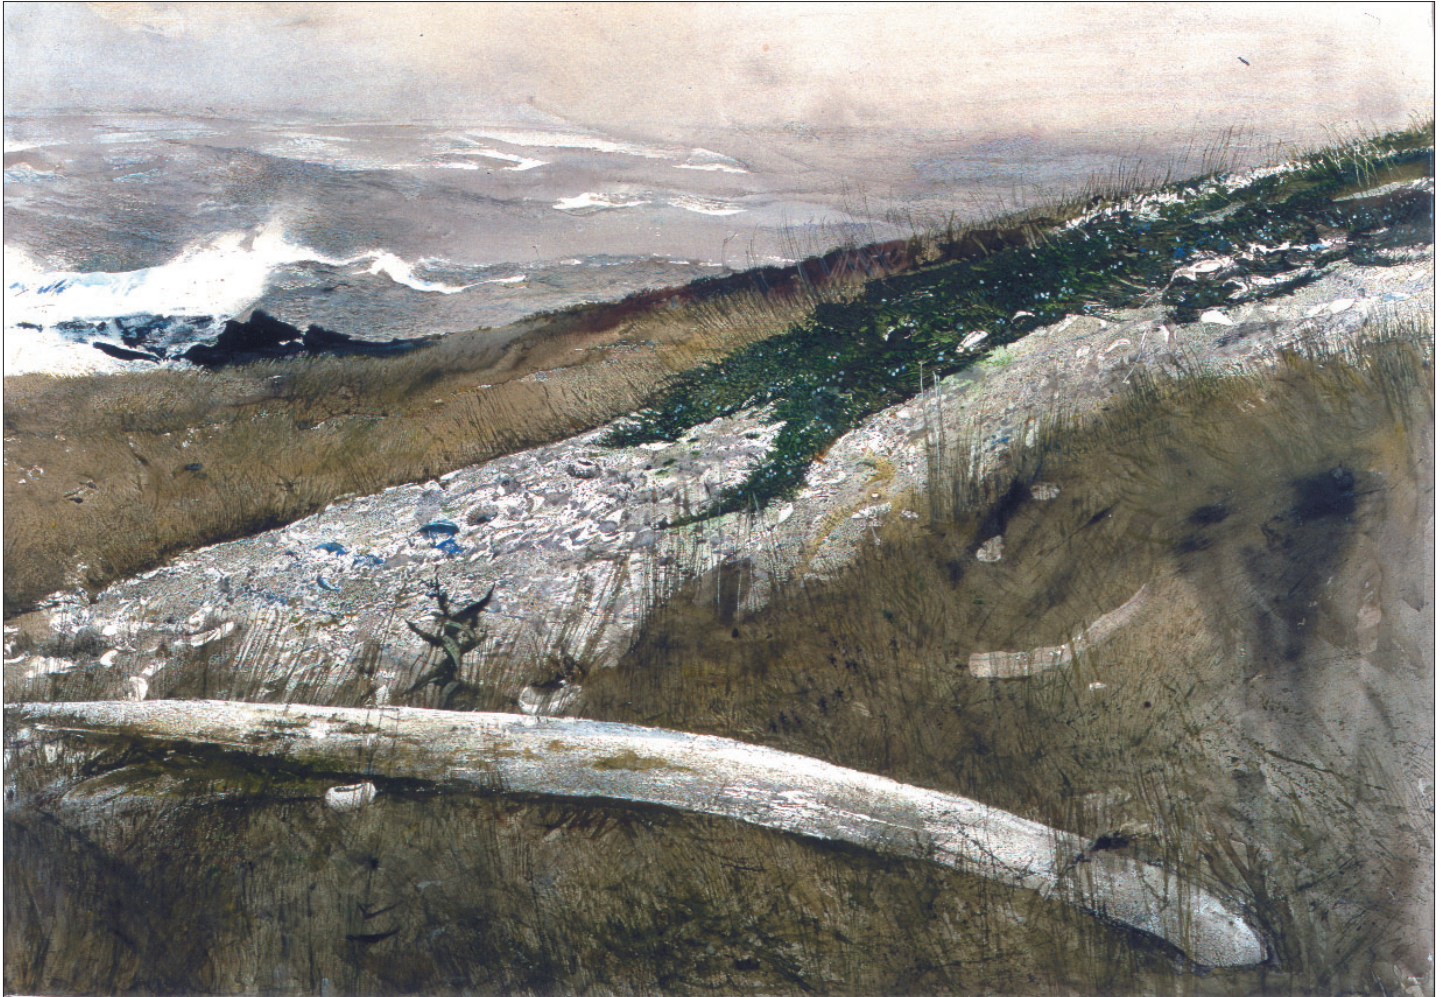

In This Issue: The 2011 APA Achievement Award Winners

- ◆ Taking a Closer Look at Racial-Ethnic Disparities: Two New Investigations
- ◆ Focus on Interventions: Ten Reports on an Array of Approaches to Care
- ◆ Budget Cuts and Reform: Factors Contributing to the Growing Crisis for CMHCs
