# TAKING ISSUE

## Why Not Implement Supported Employment?

Several facts are clear. Most people with serious mental illnesses want to work in competitive jobs. They want to be productive, have a role in their communities, and pay taxes. They see employment as an essential aspect of recovery. Evidence-based supported employment, also called individual placement and support or IPS, can help about two-thirds of them to succeed: 17 randomized controlled trials confirm the effectiveness of IPS supported support. Those who are working reduce their use of mental health services and reduce their disability benefits in keeping with the rules governing the amount of work they perform. Furthermore, close personal contact in the workplace is arguably the most successful strategy to overcome stigma.

Therefore, we ask ourselves these questions every day: Why do federal and state governments espouse a recovery philosophy but ignore employment? Why do they spend hundreds of millions of dollars each year funding day centers, sheltered workshops, and other ineffective programs rather than IPS supported employment? Why are less than 2% of those in need able to access IPS supported employment?

Is the problem resistance by the workforce? In an article in this issue Pogoda and colleagues make several excellent points regarding barriers that impede the dissemination and implementation of evidence-based supported employment within the Department of Veterans Affairs health care system. We have encountered similar barriers within the federal-state public health care systems. Hardworking clinicians believe in what they do every day and are reluctant to change as new interventions arise. But providers also want to help their clients recover. Our experience has been that providers readily embrace IPS supported employment and master new skills as soon as they see their clients working and recovering. Leadership, persistence, and good intentions generally prevail.

Unfortunately, a much larger barrier prevents the adoption of evidence-based supported employment. The crux of the matter is our failure to develop a clear, simple, direct funding mechanism. No single agency funds IPS supported employment, and providers must cobble together funding from multiple sources. And as several state mental health directors have said to us, "I hate to waste money on daycare programs, but that's what Medicaid pays for." Why hasn't this problem been solved? At the federal and state levels, leaders protect their bureaucracies, funding silos, and organizational barriers. In doing so, they block the adoption of evidence-based practices, subvert recovery, hold people with disabilities hostage, neglect the basic human right to social inclusion, and impede society's efforts to overcome stigma. We can only hope that good sense, humanism, and science will eventually win out.—ROBERT E. DRAKE, M.D., PH.D., AND DEBORAH R. BECKER, M.ED., C.R.C., *Dartmouth Psychiatric Research Center, Lebanon, New Hampshire*

*Psychiatric Services*, established in 1950, is published monthly by the American Psychiatric Association for mental health professionals and others concerned with treatment and services for persons with mental illnesses and mental disabilities, in keeping with APA's objectives to improve care and treatment, to promote research and professional education in psychiatric and related fields, and to advance the standards of all psychiatric services and facilities.

### Editor

Howard H. Goldman, M.D., Ph.D.

### Editorial Board

David A. Adler, M.D.

Javier I. Escobar, M.D.

Stephen M. Goldfinger, M.D.

Richard K. Harding, M.D.

Grayson S. Norquist, M.D., M.S.P.H.

Martha Sajatovic, M.D.

Gregory E. Simon, M.D., M.P.H.

Bradley D. Stein, M.D., Ph.D.

Marvin S. Swartz, M.D.

Marcia Valenstein, M.D.

Roy C. Wilson, M.D.

Bonnie T. Zima, M.D., M.P.H.

### Editor Emeritus

John A. Talbott, M.D.

### Book Review Editor

Jeffrey L. Geller, M.D., M.P.H.

### Contributing Editors

Paul S. Appelbaum, M.D., *Law & Psychiatry*

José Miguel Caldas de Almeida, M.D.,

and Marcela Horvitz-Lennon, M.D., M.P.H., *Mental Health Care Reforms in Latin America*

Francine Cournos, M.D., and Stephen M. Goldfinger, M.D., *Frontline Reports*

Lisa B. Dixon, M.D., M.P.H., and Brian Hepburn, M.D., *Public-Academic Partnerships*

Jeffrey L. Geller, M.D., M.P.H., *Personal Accounts*

William M. Glazer, M.D., *Best Practices*

Amy M. Kilbourne, Ph.D., M.P.H., and Tami L. Mark, Ph.D., *Data Points*

Matt Muijen, M.D., Ph.D., *Mental Health Care Reforms in Europe*

Fred C. Osher, M.D., *State Mental Health Policy*

Jules M. Ranz, M.D., and Susan M. Deakins, M.D., *Case Studies in Public-Sector Leadership*

Steven S. Sharfstein, M.D., Haiden A. Huskamp, Ph.D., and Alison Evans Cuellar, Ph.D., *Economic Grand Rounds*

### Statistical Consultant

Deborah R. Medoff, Ph.D.

### Editorial Consultants

Norman Clemens, M.D.

Julie M. Donohue, Ph.D.

Robert E. Drake, M.D., Ph.D.

Marcia Kraft Goin, M.D., Ph.D.

Shelly F. Greenfield, M.D., M.P.H.

M. Susan Ridgely, J.D.

Laura Van Tosh

### Editorial Staff

Constance Grant Gartner, *Managing Editor*

Demarie S. Jackson, *Associate Editor*

Kathleen Stearman, *Associate Editor*

Wendy Lieberman Taylor, *Production Manager*

### Publisher

Rebecca D. Rinehart

### American Psychiatric Association

John M. Oldham, M.D., *President*

Dilip V. Jeste, M.D., *President-Elect*

Roger Peele, M.D., *Secretary*

David Fassler, M.D., *Treasurer*

Ann Marie T. Sullivan, M.D., *Speaker,*

*APA Assembly*

James H. Scully, M.D., *Medical Director and CEO*
